# Supplementary material for: Genetic variation in the C-type lectin receptor CLEC4M in type 1 von Willebrand Disease patients
Source: PLoS One. 2018 Feb 1;13(2):e0192024. doi: 10.1371/journal.pone.0192024 (PMC5794141; doi:10.1371/journal.pone.0192024)
Supplement: S1 Table — (XLSX) [file pone.0192024.s001.xlsx]

## Sheet: Blad1
S1 Table. Primers for CLEC4M.
Region	Forward	Reverse
VNTR Genotyping, exon 4	CTGGCTCTCCTTGGCCTTC	AAGGACCCTTGATGTGCAGG
LRPCR promoter - exon4	TGCCCTTGATGTTATTAGACCCTC	GCGTCTTGCTCGGATTGTTC
Sequence promoter - exon4	CTGGGTAAGGCTGGGTTGG	-
Sequence promoter - exon4	CCTGGATGCCTGAGTCCTG	-
Sequence promoter - exon4	GGGAGGTGGACGCAGGTA	-
Sequence promoter - exon4	-	AGGTACCTGCGTCCACCTC
Sequence promoter - exon4	-	AGGACTCAGGCATCCAGGT
Sequence promoter - exon4	-	GTTCCAACCCAGCCTTACCC
LRPCR intron 4 - exon 7	GGTCCTTGGGCCTGAGATG	AACCGTCTCAGGGCATTTGT
Sequence intron 4 - exon 7	GTAAGCAAACCACCACAGCA	-
Sequence intron 4 - exon 7	GAGCTTGCCCTGTGGGTAG	-
Sequence intron 4 - exon 7	ACAGCCTCAGTAGGAGTCCT
Sequence intron 4 - exon 7	-	GGACTCCTACTGAGGCTGTG
Sequence intron 4 - exon 7	-	CACAGGGCAAGCTCCTCC
Sequence intron 4 - exon 7	-	TGCTGTGGTGGTTTGCTTAC
